# Supplementary material for: Functional Spectroscopy Mapping of Pain Processing Cortical Areas During Non-painful Peripheral Electrical Stimulation of the Accessory Spinal Nerve
Source: PubMed Central journal article supplement (PMC6585570; doi:10.3389/fnhum.2019.00200), 2019-06-13

1 **7. Appendices**

2 **Supplementary data - HbO mean curves in each channel between groups (40 channels).**

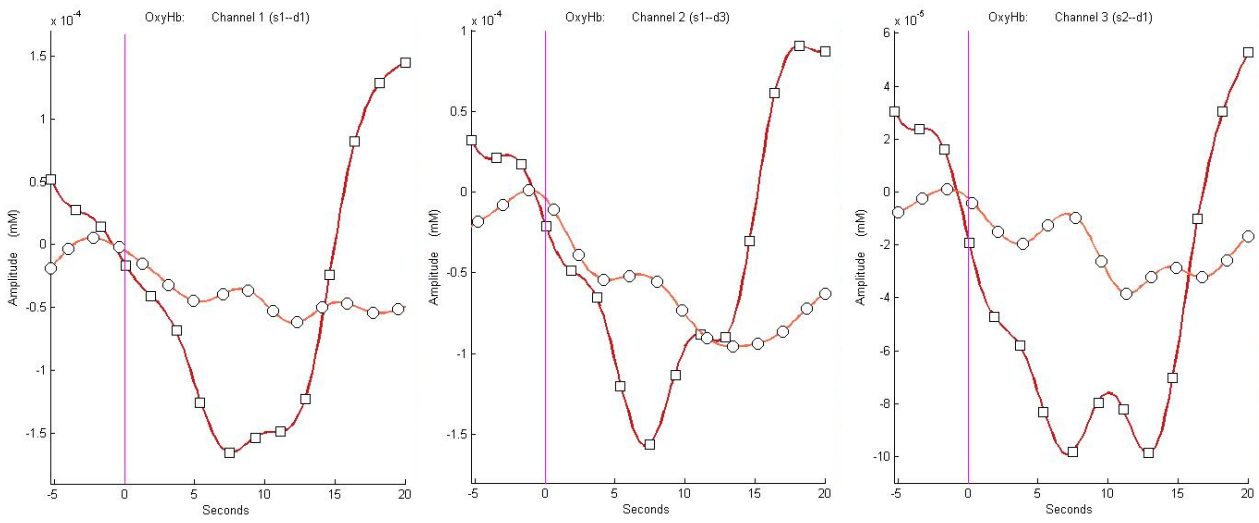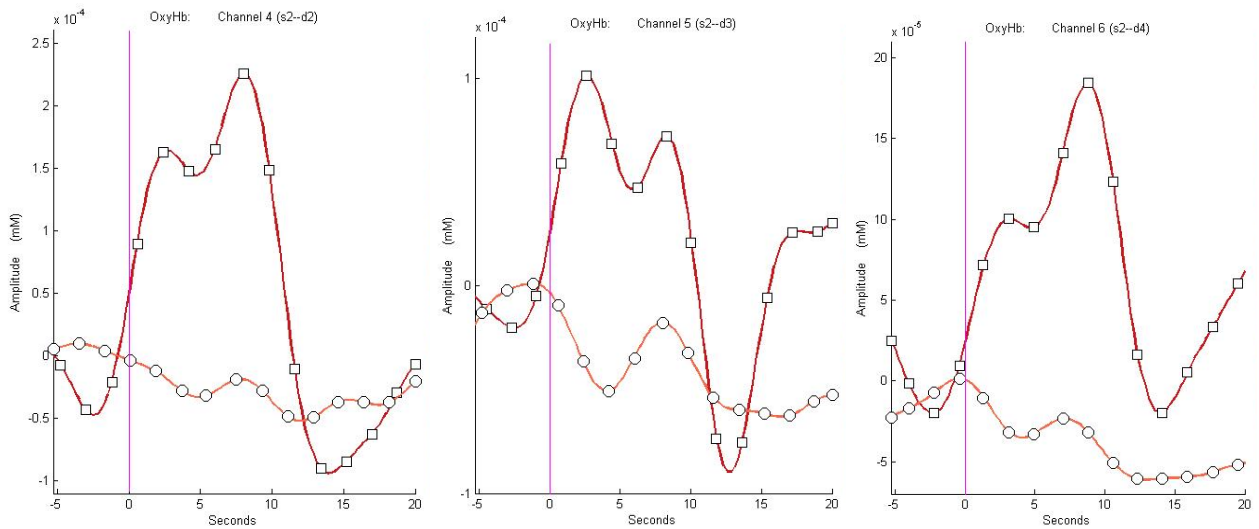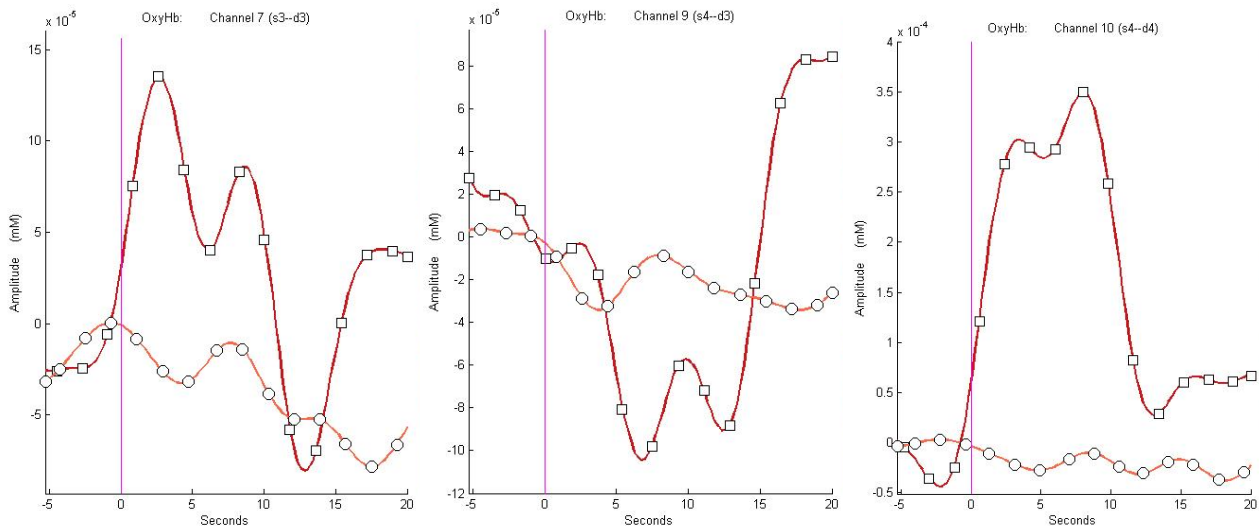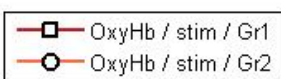

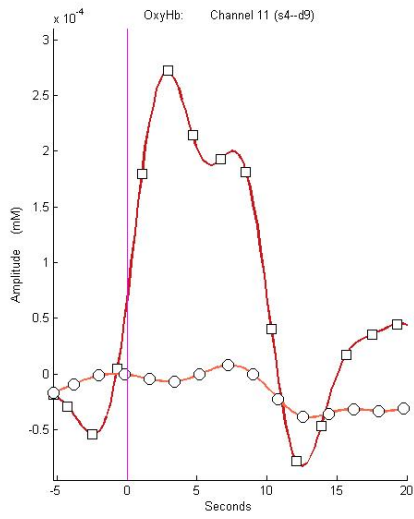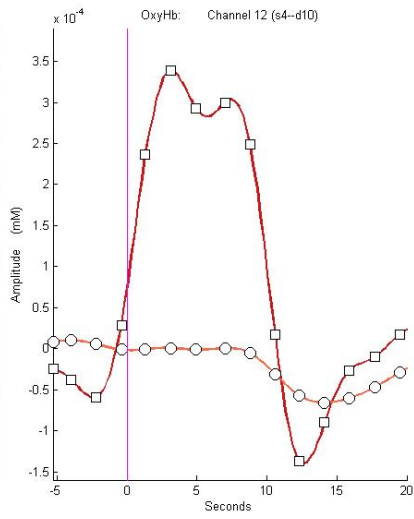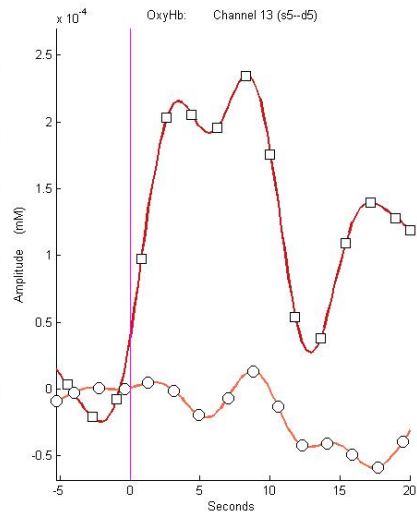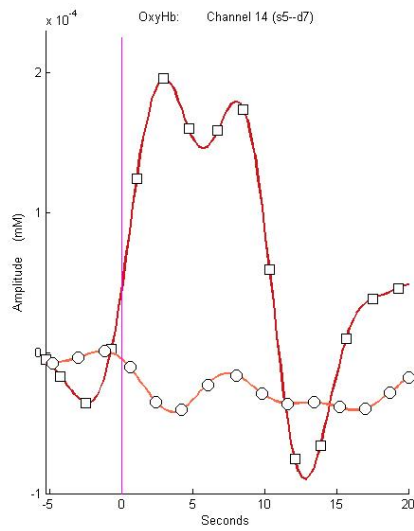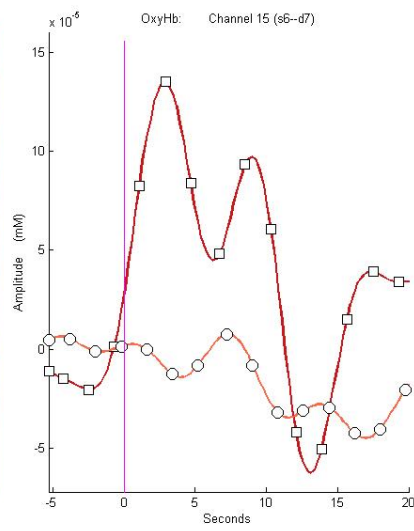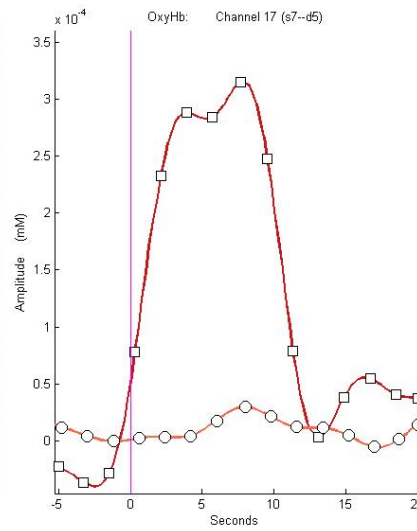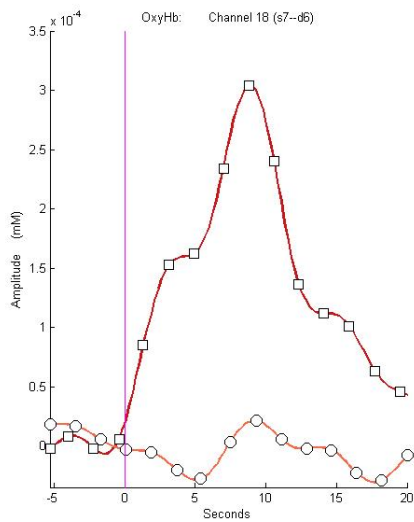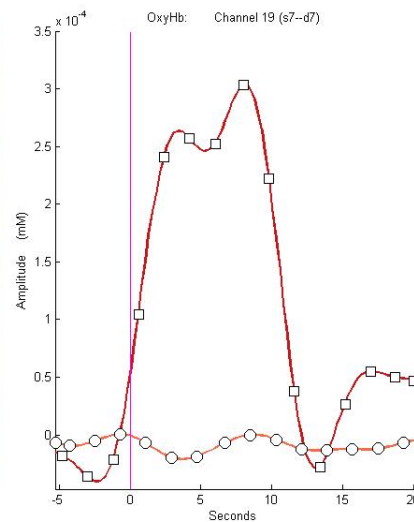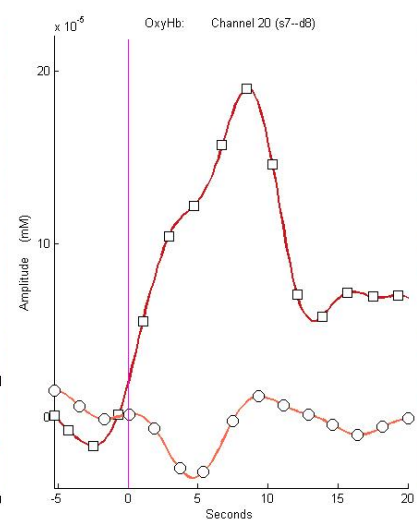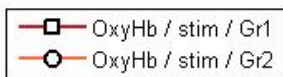

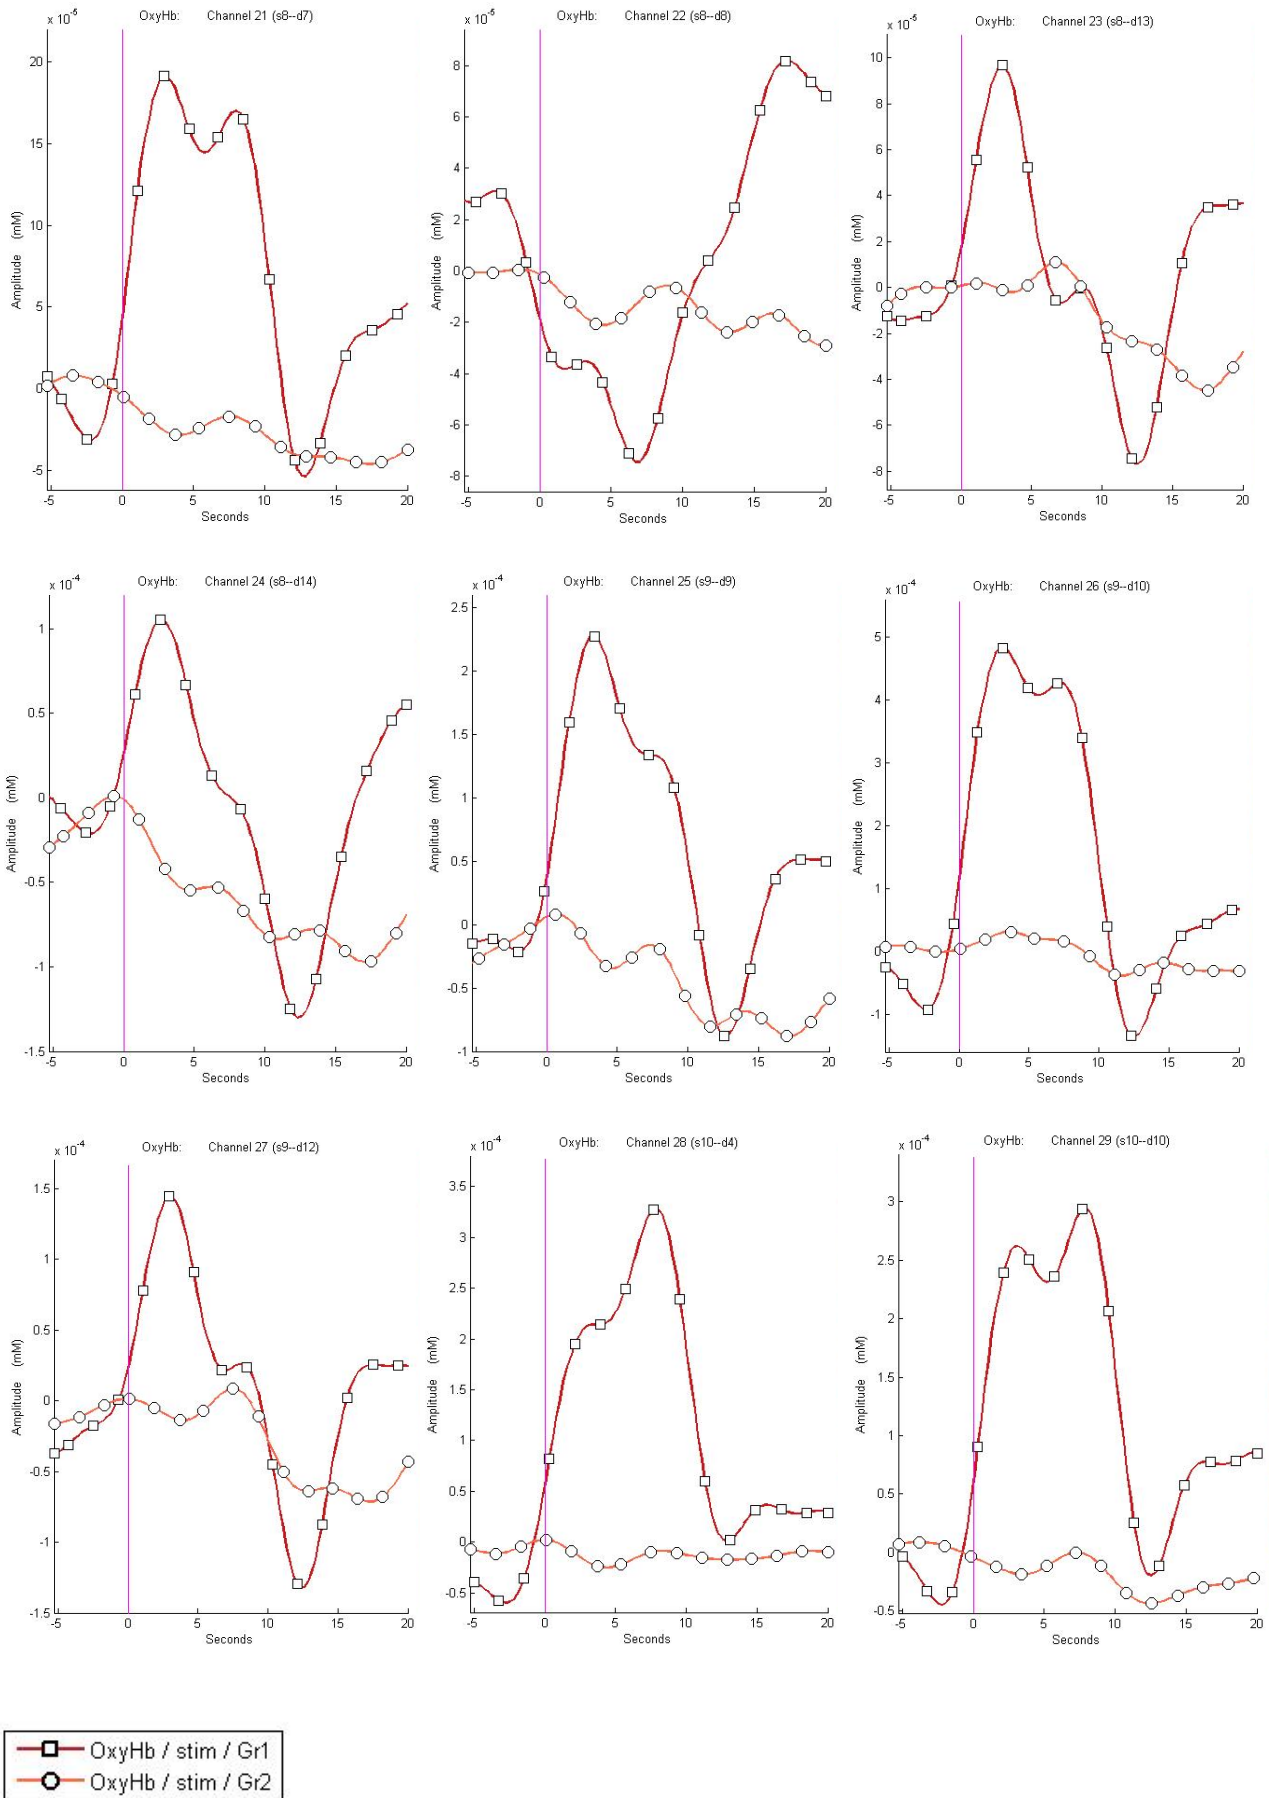

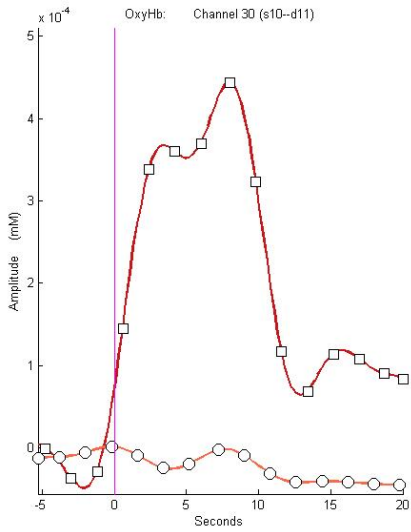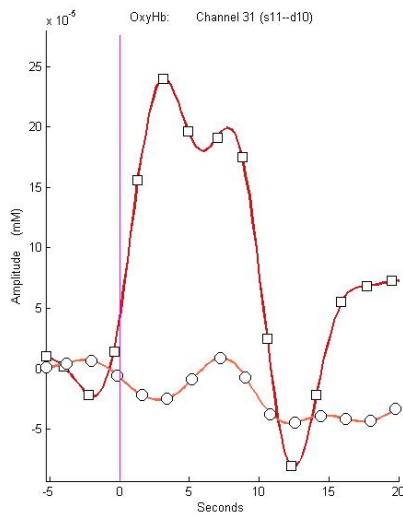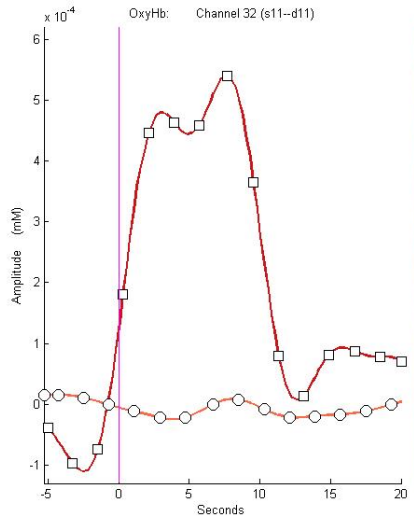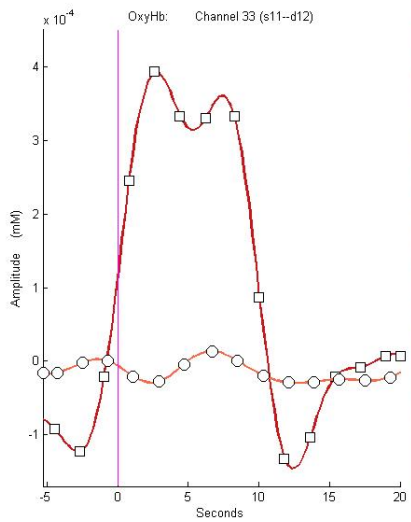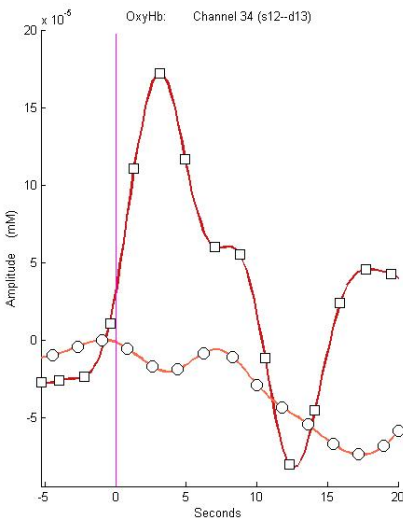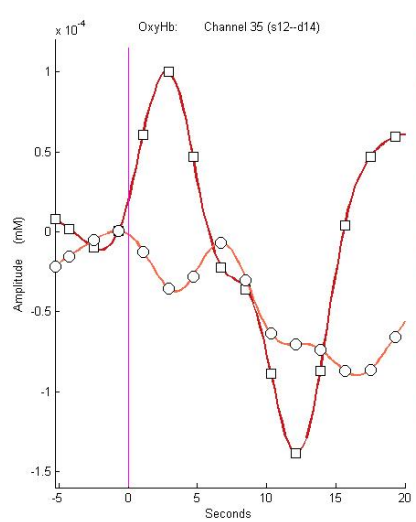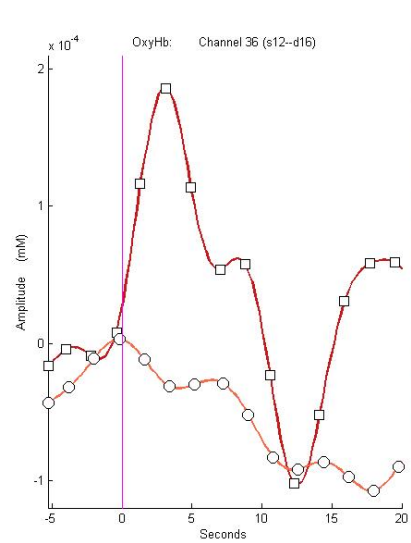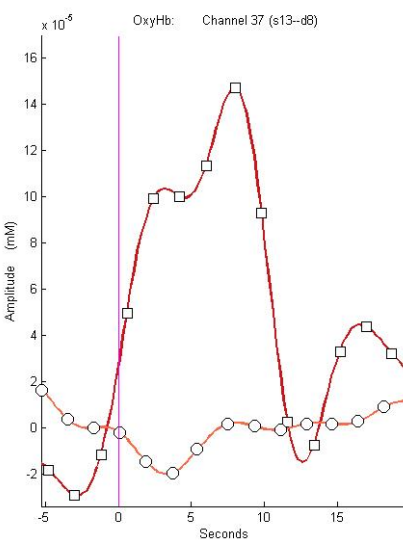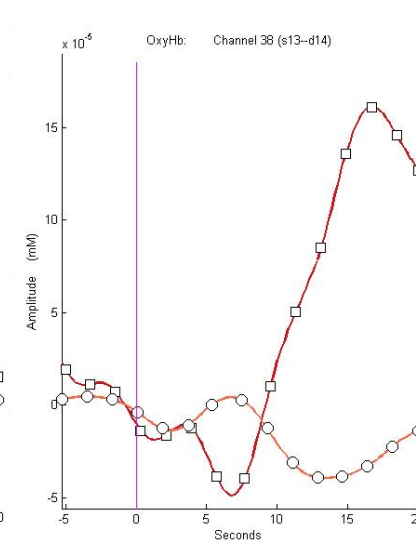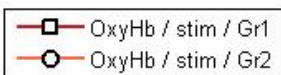

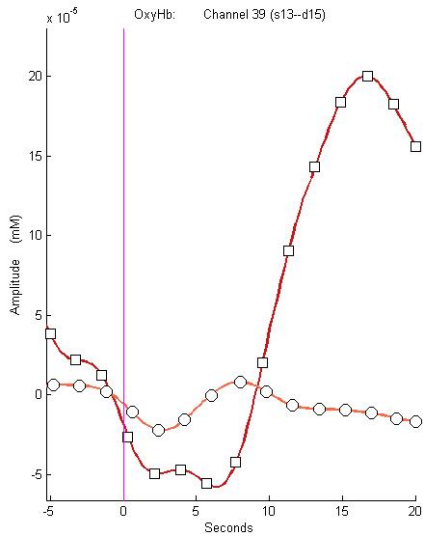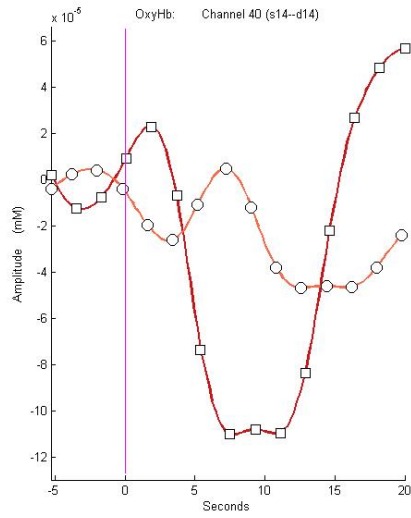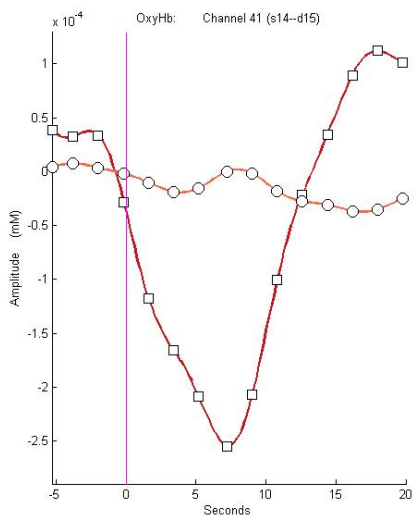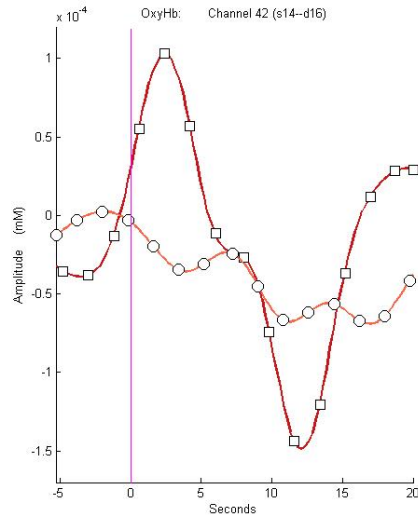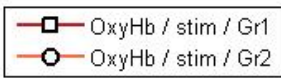

Supplement: Data_Sheet_1.pdf [file Data_Sheet_1.pdf]
